# Supplementary material
Source: PubMed Central journal article supplement (PMC2814513)
Supplement: tpc.109.070201_1.pdf [file tpc.109.070201_1.pdf]

**Supplemental Data. Linkies et al. (2009).** Ethylene interacts with abscisic acid to regulate endosperm rupture during germination; a comparative approach using *Lepidium sativum* (cress) and *Arabidopsis thaliana*.

## Supplemental Figure 1

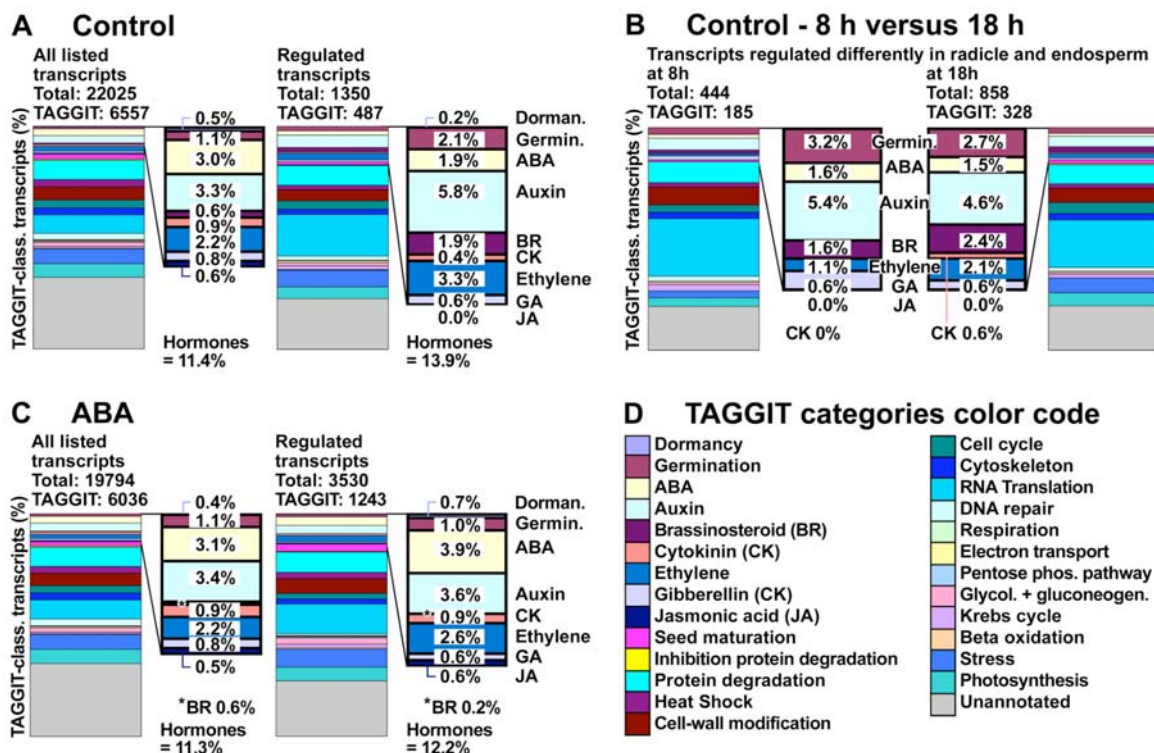

**Supplemental Figure 1. TAGGIT analysis of functional categories in the *Lepidium sativum* FR1 transcriptome datasets.** The seed-specific TAGGIT workflow (Carrera et al. 2007; Holdsworth et al., 2008) was applied to *Lepidium* transcriptome datasets to provide proportional representations of genes in functional categories. **(A, B)** Comparison of CON array lists: **(A)** All transcripts belonging to TAGGIT functional categories (6557 of 22025 transcripts, Supplemental Dataset 3 online) and significantly regulated transcripts belonging to TAGGIT functional categories (487 of 1350 transcripts, Supplemental Dataset 5 online). **(B)** Transcripts belonging to TAGGIT functional categories that are regulated in a significantly different way in the radicle and endosperm at 8 h and 18 h (CON-array, Supplemental Dataset 5 online). **(C)** Comparison of ABA array lists: All transcripts belonging to TAGGIT functional categories (6036 of 19794 transcripts, Supplemental Dataset 4 online) and significantly regulated transcripts belonging to TAGGIT functional categories (1243 of 3530 transcripts, Supplemental Dataset 6 online). **(D)** Key to the colour representation of TAGGIT functional categories (Holdsworth et al., 2008). **(A-C)** The TAGGIT analysis suggests that ethylene-related transcripts are important for germination and for counteracting the ABA inhibition. Supplemental Datasets 3-6 provide lists of the transcripts from which the subsets belonging to different TAGGIT functional categories can be extracted by sorting for the TAGGIT column. For example, the numbers (percentages) of transcripts in the functional category 'ethylene' are for 'all transcripts' and 'regulated transcripts' in **(A)** 144 (2.2%) and 16 (3.3%) for CON and in **(B)** 131 (2.2%) and 32 (2.6%) for ABA.

## Supplemental Figure 2

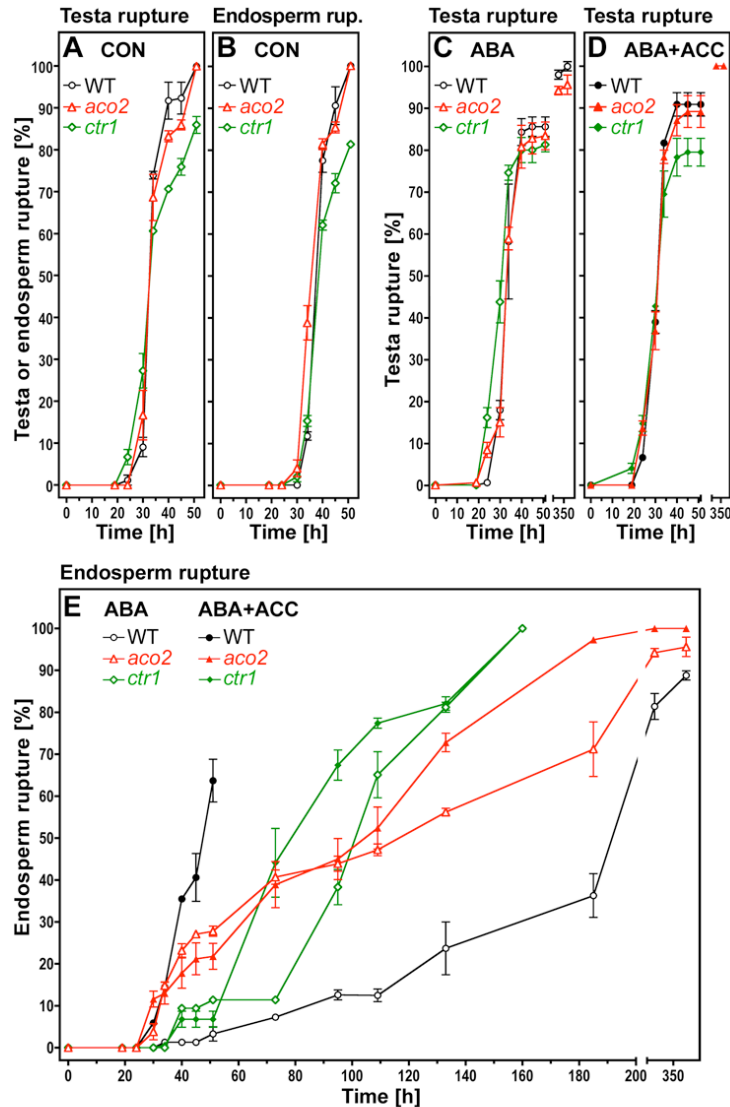

**Supplemental Figure 2. The effect of ACC and ABA on the germination of *Arabidopsis thaliana*: Wild type (Col) and ethylene-related mutants (*aco2*, *ctr1*).** (A-E) Time course analyses of testa and endosperm rupture of wild type (WT), the ACO2-deficient mutant *aco2* and the loss-of-function signaling mutant *ctr1*. (A) Testa and (B) endosperm rupture under optimal conditions (CON, no hormone addition to the medium). (C,D) Testa rupture of seeds incubated in the presence of (C) ABA or (D) ABA+ACC. (E) Endosperm rupture of seeds incubated in the presence of ABA or ABA+ACC. Incubation conditions: continuous light, 24°C, no cold-stratification. Medium additions, as indicated: 1  $\mu$ M ABA, 1 mM ACC. Mean values  $\pm$  SE of three x 50 seeds are presented.



**B** Brassicaceae ACC Oxidase 2 alignments: At ACO2 (At1g62380) and Lesa ACO2 (GQ221032)

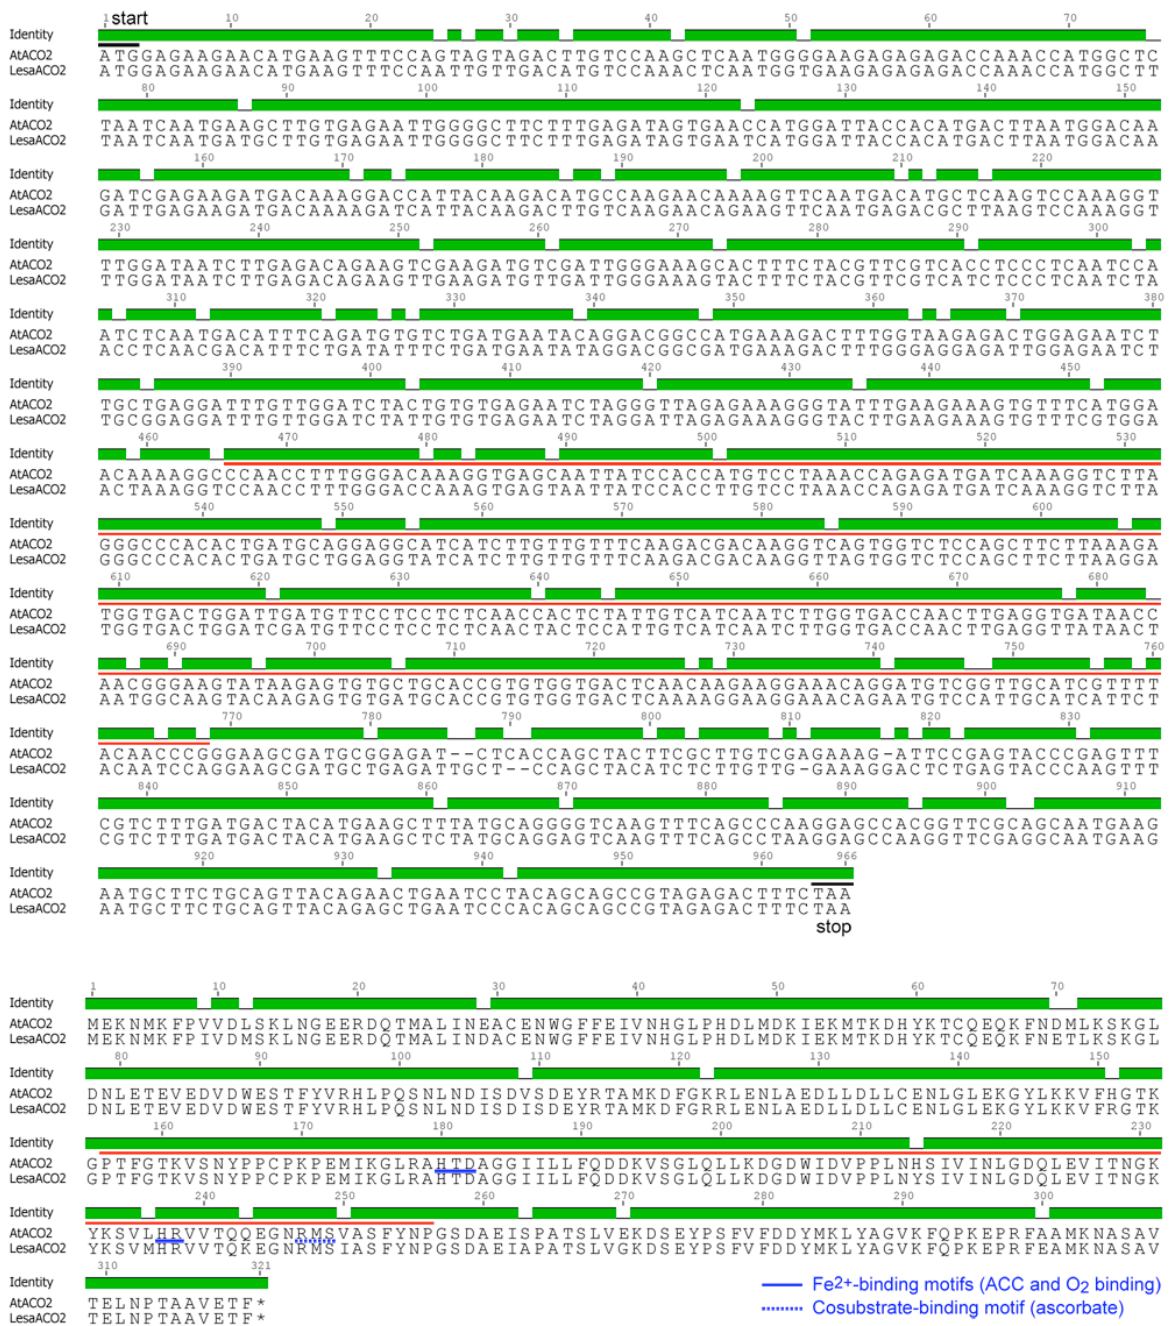





**D**

**Brassicaceae ACC Oxidase 2 orthologous cDNA alignments:**  
**Lineage I (Arabidopsis, Lepidium): At ACO2 (At1g62380) and Lesa ACO2 (GQ221032)**  
**Lineage II (Brassica, Sisymbrium): Br ACO1 (AJ309322) and So ACO2 (EU689115)**

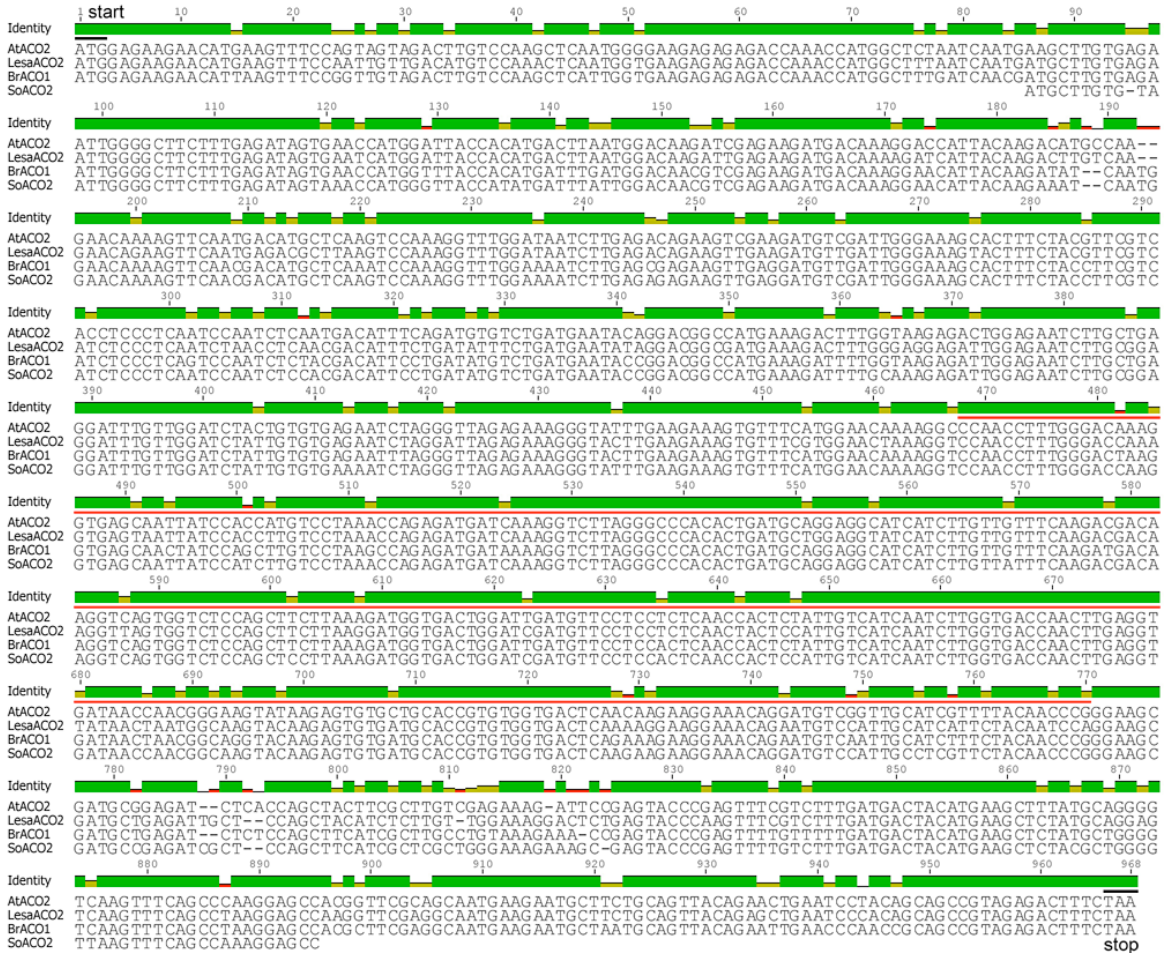

**Supplemental Figure 3. Brassicaceae ACC oxidase (ACO) sequence comparisons. (A-C)** Alignments of *Arabidopsis thaliana* Col and *Lepidium sativum* FR14 mRNA (cDNA) and amino acid sequences of the ACO orthologs. The conserved InterPro ([www.ebi.ac.uk/interpro/](http://www.ebi.ac.uk/interpro/)) domain regions of 2OG-Fe(II)-oxygenases are underlined in red. The start and stop codons in the cDNA sequences are underlined and marked as start and stop in black. The conserved active binding site motifs for the substrates ACC and O<sub>2</sub> as well as the cosubstrate binding site for ascorbate (Seo et al. 2004) are underlined in blue in the amino acid sequences and indicate that these proteins are functional ACOs. **(A)** *Arabidopsis* ACO1 (At2g19590) and *Lepidium* ACO1 (GQ221031). **(B)** *Arabidopsis* ACO2 (At1g62380) and *Lepidium* ACO2 (GQ221032). **(C)** *Arabidopsis* ACO4 (At1g05010) and *Lepidium* ACO4 (GQ221033). The corresponding *Arabidopsis* ACOs and *Lepidium* ACOs are true orthologs based on the highest BLAST hits and the molecular phylogenetic analysis. **(D)** Alignment of Brassicaceae ACO2 orthologs which show transcript expression pattern in seeds (Fig. 7F) that are associated with germination responses. Brassicaceae lineage I (*Arabidopsis thaliana* (At), *Lepidium sativum* (Lesa)) and lineage II (*Brassica rapa* (Br), *Sisymbrium officinale* (So)) cDNA sequences are presented. At least three independent cDNA clones were sequenced for each *Lepidium* ortholog.



**Supplemental Figure 4**

Symbols used in Supplemental Figure 4

Real-time qRT-PCR CON: ● Cap ● Rad  
 ABA: ○ Cap ○ Rad

CATMA microarrays CON: ■ Cap ▼ Rad  
 ABA: □ Cap ▽ Rad ] and additional other black symbols/lines as indicated

Cap = micropylar endosperm  
 Rad = radicle

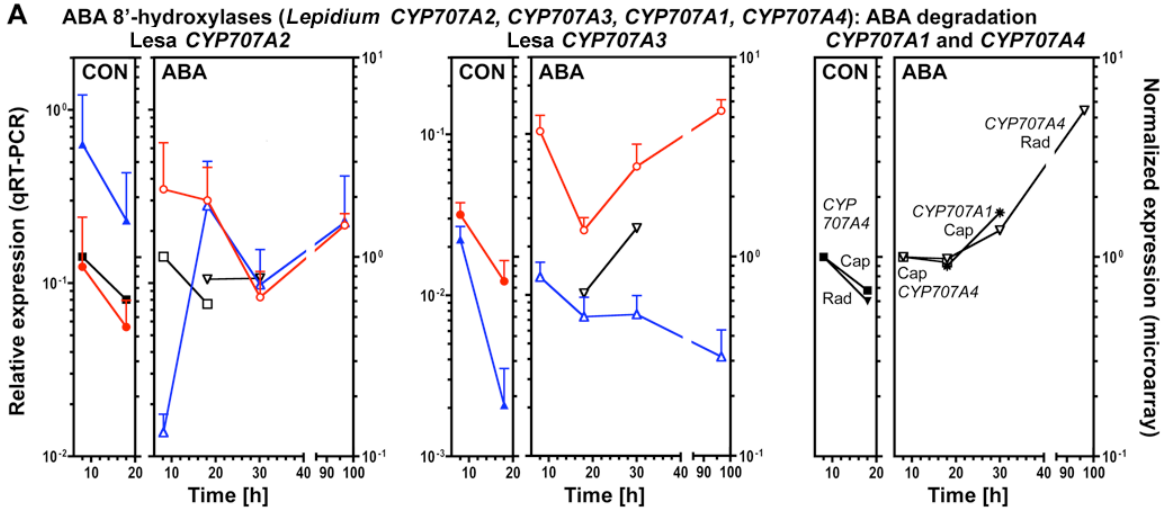

**B Ethylene receptors (*ETR1, ETR2, ERS1, ERS2, EIN4*)**

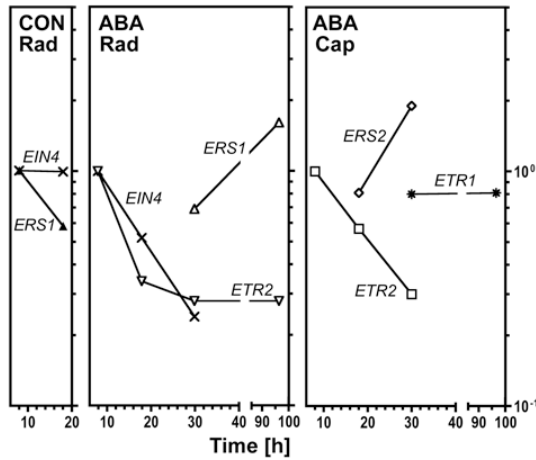

**C EIN2, EIN3, EBF2, EBF1**

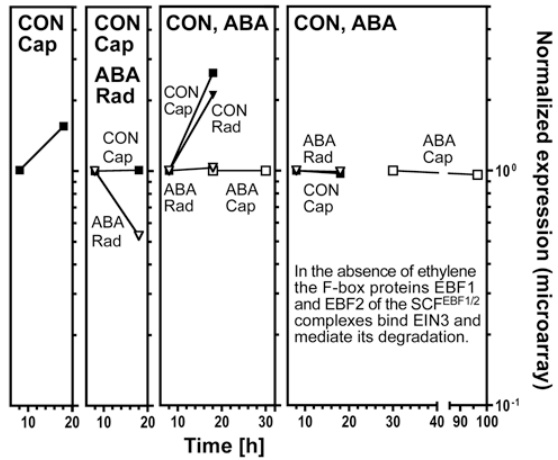

Symbols used in Supplemental Figure 4

Real-time qRT-PCR CON: ● Cap ▲ Rad  
 ABA: ○ Cap △ Rad

CATMA microarrays CON: ■ Cap ▼ Rad ] and additional other black symbols/lines as indicated  
 ABA: □ Cap ▽ Rad

Cap = micropylar endosperm  
 Rad = radicle

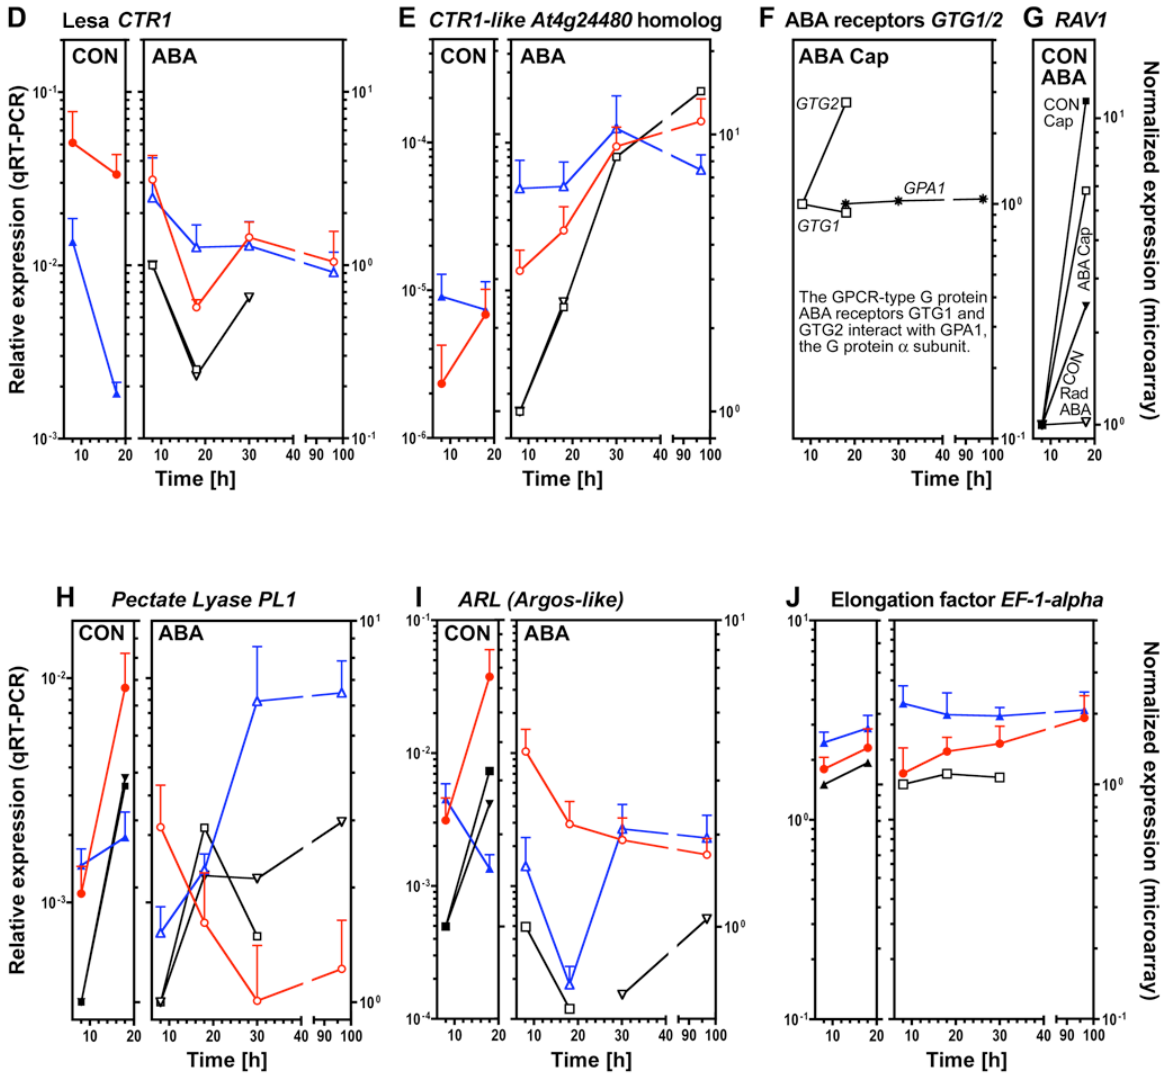

**Supplemental Figure 4. Analysis of transcript expression by qRT-PCR and microarray analysis in specific seed tissues of *Lepidium sativum* FR1 during germination.** Time course transcript expression data are presented for endosperm caps (Cap) and radicles (Rad) dissected from seeds incubated at 24°C in continuous light in medium without (CON) or with 10 µM ABA added. For qRT-PCR relative  $\Delta\Delta C_t$  expression values based on the comparison with validated constitutive transcripts are presented. *Lepidium* transcripts named with the prefix 'Lesa' were analysed by qRT-PCR primers designed on the basis of their cloned cDNA sequences. *Lepidium* transcripts without this prefix in their name were analysed with a qRT-PCR primer design based on *Arabidopsis* cDNA sequences. Primer sequences for the qRT-PCR are presented in Supplemental Table 1 online. **(A)** ABA 8'-hydroxylases: Four *CYP707A* genes are known in *Arabidopsis* and all provided expression results in the *Lepidium* seed arrays. Two *Lepidium* cDNAs were cloned (*Lepidium CYP707A2* and *CYP707A3*) and on the basis of their sequence analyses, represent putative *Lepidium* orthologs of *Arabidopsis CYP707A2* and *CYP707A3*, respectively. **(B)** Ethylene receptors. **(C)** Ethylene signaling components. **(D)** Ethylene signaling repressor *CTR1* (*Constitutive Triple Response1*); the cDNA of the putative *Lepidium* ortholog *CTR1* was cloned. **(E)** *CTR1*-like serine/threonine protein kinase. **(F)** GPCR-type G protein ABA receptors *GTG1* and *GTG2* and their interacting G protein  $\alpha$  subunit *GPA1*. **(G)** *RAV1*, an AP2/EREBP-type transcription factor with an ABI3/VP1-like domain. **(H)** *PL1*, *Pectate lyase1*. **(I)** *ARL*, *Argos-like*, putative cell expansion gene. **(J)** *EF-1-alpha*, Transcription elongation factor 1-alpha. Mean values  $\pm$ SE of four independent biological RNA samples obtained from 1000 endosperm caps or 100 radicles from seeds with ruptured testa, but intact endosperm are presented for the qRT-PCR results. Normalized microarray differences are presented for comparison.

Supplemental Figure 5

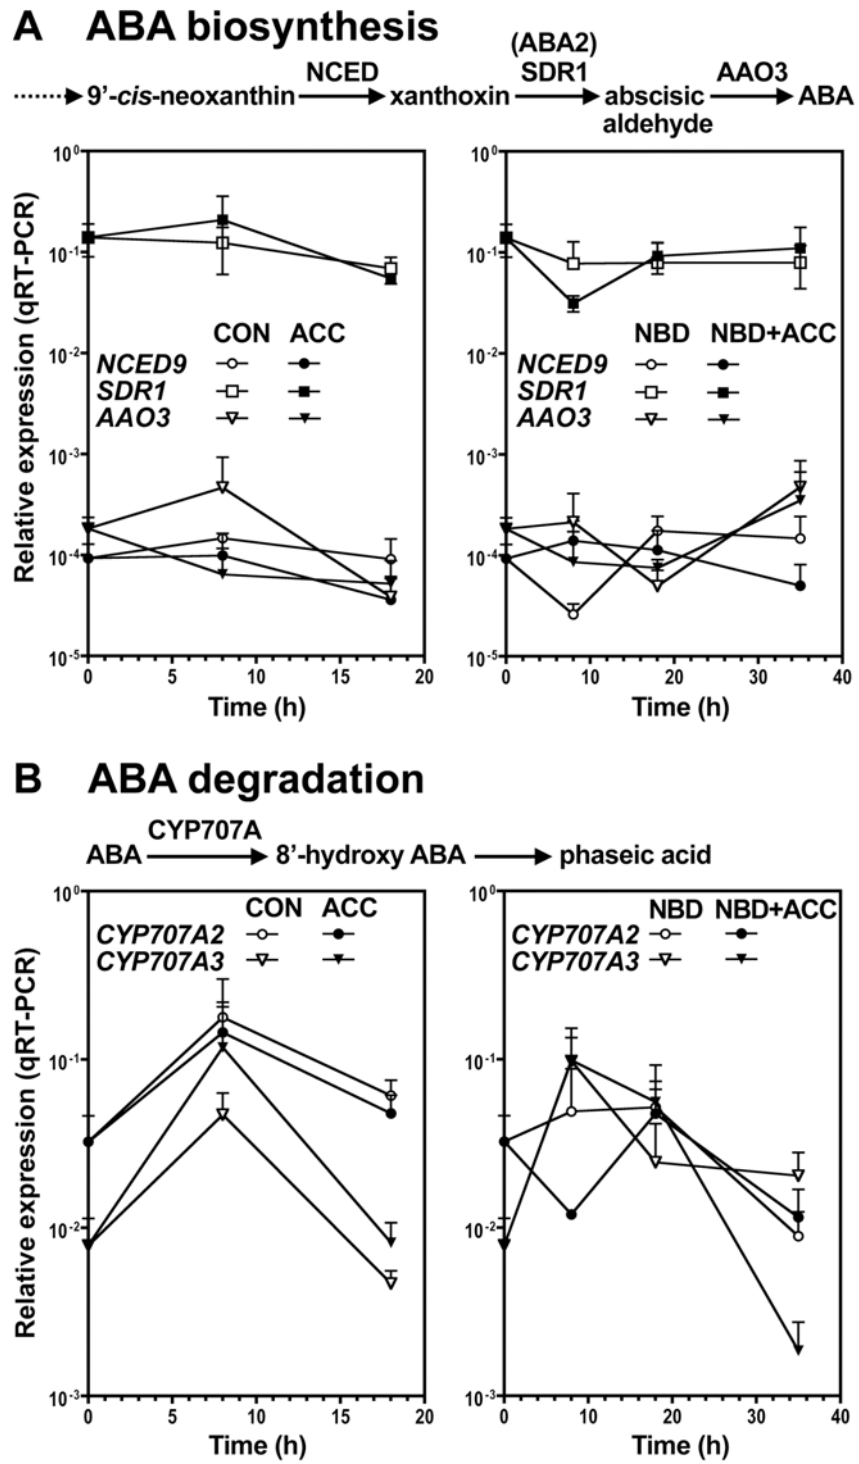

**Supplemental Figure 5. Analysis of the transcript expression of key ABA metabolism genes, in whole *Lepidium sativum* FR14 seeds, by qRT-PCR following treatment with ACC or NBD.** Time course transcript expression data are presented for whole seeds incubated at 24°C in continuous light in absence (CON) or presence of the ethylene precursor ACC (1 mM), the ethylene action inhibitor NBD (100 µl/l applied via the gas phase), or the combination NBD+ACC. For qRT-PCR, relative  $\Delta\Delta C_t$  expression values based on the comparison with validated constitutive transcripts are presented. Primer sequences for the qRT-PCR are presented in Supplemental Table 1 online. **(A)** qRT-PCR for transcripts of key regulatory genes for ABA biosynthesis: *NCED9* = *NINE-cis-EPOXYCAROTENOID DIOXYGENASE9*, *SDR1* = *SHORT-CHAIN DEHYDROGENASE REDUCTASE1* (also known as *ABA2*), *AAO3* = *ABSCISIC ALDEHYDE OXIDASE3*. **(B)** qRT-PCR for transcripts of key regulatory genes for ABA degradation: The *Lepidium* ABA 8'-hydroxylases *CYP707A2* and *CYP707A3* were analysed. Mean values +SE of three independent biological RNA samples are presented.

## Supplemental Methods

### aRNA labelling and CATMA microarray hybridization

The *Lepidium sativum* FR1 (Freiburg1) aRNA was labelled and the CATMA microarrays were hybridized according to the method described in Lim et al. (2007). Briefly, 5 µg of aRNA was reverse transcribed using random nonamers (Invitrogen, UK) and SuperScript II (Invitrogen, UK). The Cy3- and Cy5-labelled cDNA probes were prepared, whereby amino allyl-dUTP was incorporated during cDNA synthesis followed by chemical labeling of the amino allyl-modified cDNA using CyDye NHS-esters (Amersham Biosciences, NJ, USA). Reactions were incubated at 42°C for 2.5 h and terminated by the addition of 2 µL NaOH and an additional incubation at 37°C for 15 min. The labelled cDNA was neutralised by adding 10 µL 2 M MOPS buffer and purified using the Qiagen PCR Purification Kit (Qiagen, UK). Cy3- and Cy5-labelling efficiency was quantified using a nanodrop ND Spectrophotometer (NanoDrop Technologies, Rockland, DE). An aliquot, containing 40 pmol of Cy dye label, was used for subsequent microarray hybridisations.

The CATMA microarray slides were prehybridised in 60 mL prehybridisation buffer (1% (w/v) BSA, 5 x SSC buffer, 0.1% (w/v) SDS) at 42°C for 2 h. Cy3- and Cy5-labelled cDNAs were freeze-dried and resuspended in 70 µL of hybridisation buffer (25% (v/v) formamide, 5 x SSC, 0.1% (w/v) SDS, 0.5% (w/v) yeast tRNA (invitrogen, UK)). The microarray slides were washed five times in water and twice in isopropanol and dried by centrifugation at 1500 rpm for 2 min. The cDNA probes were denatured by incubation at 95°C for 5 min and applied directly to the microarray slides that were held in a hybridisation chamber (Corning Life Sciences, Netherlands). The microarrays were covered with a coverslip (Sigma Aldrich, UK) and hybridised overnight at 42 °C in a hybridisation oven. The microarrays were then subjected to the following washings: once in Wash Solution 1 (2x SSC, 0.1% (w/v) SDS) pre-warmed to 42°C for 5 min; once with Wash solution 2 (0.1 x SSC, 0.1% (w/v) SDS) at room temperature for 10 min; and five times in Wash solution 3 (0.1 x SSC only) at room temperature for 10 min. The arrays were then transferred to isopropanol for a few seconds and centrifuged at 1500 rpm for 2 min. All washes were performed on an orbital shaker with vigorous shaking. The microarrays were then scanned using an Affymetrix 428 array scanner at 532 nm (Cy3) and 635 nm (Cy5). Scanned data were quantified using Imagene version 4.2 software (BioDiscovery, <http://www.biodiscovery.com/>).

### **Lepidium and Arabidopsis Genomic DNA Extraction and Labeling for Hybridisation to CATMA Microarrays**

Genomic DNA was extracted from *L. sativum* FR1 and *Arabidopsis thaliana* Cvi leaf tissue using a modified CTAB extraction protocol. Approximately 100 mg of leaf tissue was homogenised in liquid nitrogen and ground fully in 300 µL of CTAB-Buffer B (100 mM Tris/HCl (pH 8.0), 1.4 M NaCl, 20 mM EDTA and 2% (w/v) hexadecyltrimethyl ammoniumbromide (CTAB)). The homogenate was incubated at 65°C for 15 min and spun in a microcentrifuge at 13000 rpm for 2



min to remove cell debris. The supernatant was extracted twice with an equal volume of chloroform. The genomic DNA was precipitated by adding an equal volume of CTAB-Buffer C (50 mM Tris/HCl (pH 8.0), 10 mM EDTA and 1% (w/v) CTAB) and incubated at room temperature for 2 h. The genomic DNA was pelleted by centrifugation at 13000 rpm for 10 min. The DNA pellets were then resuspended in 400  $\mu$ L 1 M CsCl and precipitated once more by the addition of 800  $\mu$ L 100% ethanol. The DNA was pelleted by centrifugation at 13000 rpm for 10 mins. The DNA pellets were washed twice with 70% (v/v) ethanol, air dried and re-suspended in TE (10mM Tris/HCl (pH 7.5), 1 mM EDTA) and RNase A (20  $\mu$ g/ $\mu$ L).

Lepidium and Arabidopsis genomic DNA was fluorescently labelled using the BioPrime Array CGH Genomic Labelling System (Invitrogen, UK). Briefly, 20  $\mu$ g of genomic DNA was mixed with 2.5x Random Primers Solution (final volume 41  $\mu$ L) and denatured at 95°C for 5 minutes and immediately placed on ice. For each labelling reaction 5  $\mu$ L of 10x dCTP mix, 3  $\mu$ L of Cy3-dCTP or Cy5-dCTP CyDye NHS-esters (Amersham Biosciences, [www5.amershambiosciences.com](http://www5.amershambiosciences.com)) and 1  $\mu$ L of Exo-Klenow fragment were added. The reactions were incubated at 37 °C for 2 h and the reaction was stopped by adding 5  $\mu$ L of Stop buffer (0.5 M EDTA). The labelled DNA was purified according to the BioPrime Array CGH Genomic Labelling System. The reaction volumes was adjusted to 100  $\mu$ L with TE, to which 400  $\mu$ L Purification Buffer A was added and this mixture was vortexed. They were then loaded on to the column provided with the Kit and centrifuged at 11000 x g for 1 min at room temperature, and the flow-through was discarded. Two-hundred microliters of Purification Buffer B was added to the column and the column was centrifugated at 1000 x g for 1 min at room temperature and the flow-through was discarded. 50  $\mu$ L dH<sub>2</sub>O was then added to the column and the column incubated at room temperature for 1 min. The labelled DNA was recovered by centrifugation at 11000 x g for 1 min at room temperature. Cy3- and Cy5-labelling efficiency was quantified using a NanoDrop ND Spectrophotometer (NanoDrop Technologies, Rockland, DE). Cy3-labelled Arabidopsis genomic DNA and Cy5-labelled Lepidium genomic DNA (reciprocal labelling were also performed) were freeze-dried together for 2 h and re-suspended in hybridisation buffer.

### **Lepidium and Arabidopsis Genomic DNA hybridisation to CATMA Microarrays**

Prehybridisation, hybridisation and washing of the CATMA version 3 microarrays is the same as outlined for the RNA microarrays above. For the genomic DNA microarrays, two independent genomic DNA preps from *A. thaliana* Cvi and *L. sativum* FR1 were labelled with both Cy3- and Cy5-dyes and hybridizing as described above for the aRNA to the CATMA v3 arrays. Thus two biological and two technical replicates were compared. The microarrays were then scanned using an Affymetrix 428 array scanner at 532 nm (Cy3) and 635 nm (Cy5). Scanned data were quantified using Imagen version 4.2 software (BioDiscovery, [www.biodiscovery.com/](http://www.biodiscovery.com/)).

### **Determination of Lepidium genes “present” on the microarray**

Spot intensity data from the genomic DNA microarrays determined using Imagen were analysed using the limma package in Bioconductor (Smyth et al. 2005). Background correction

was performed using the 'normexp' method, which is analogous to RMA. Within array normalisation (Smyth et al. 2003) was performed using print tip loess and between array normalisation using quantile normalisation on the 'A' values. For the two species separately, the normalised values for each probe were then compared to those for the 912 empty spots with a one-sided t-test. Probes for which the normalised values were significantly greater than the empty spots ( $p < 0.05$ ) were considered to be "present". The 21527 probes out of the 30343 spotted on the microarray (70.9%) were identified as having significant hybridization for *Lepidium* and therefore classified as being "present". The equivalent number for *Arabidopsis* ecotype Cvi was 28146 (93.0%).

- Lim, P.O., Kim, Y., Breeze, E., Koo, J.C., Woo, H.R., Ryu, J.S., Park, D.H., Beynon, J., Tabrett, A., Buchanan-Wollaston, V., and Nam, H.G.** (2007). Overexpression of a chromatin architecture-controlling AT-hook protein extends leaf longevity and increases the post-harvest storage life of plants. *The Plant Journal* **52**, 1140-1153.
- Smyth, G.K.** (2005). Limma: linear models for microarray data. In: *Bioinformatics and Computational Biology Solutions using R and Bioconductor*, R. Gentleman, V. Carey, S. Dudoit, R. Irizarry, and W. Huber, eds (New York: Springer), pp. 397-420.
- Smyth, G.K., and Speed, T.P.** (2003). Normalization of cDNA microarray data. *Methods* **31**, 265-273.

**Supplemental Table 1.** Primer list for transcript expression analysis by qRT-PCR.

| Gene name                 | Description                                            | Primer specificity <sup>a</sup> | Accession Number <sup>b</sup> | Forward Primer: name, sequence (5'→3')  | Reverse Primer: name, sequence (5'→3')  |
|---------------------------|--------------------------------------------------------|---------------------------------|-------------------------------|-----------------------------------------|-----------------------------------------|
| <b><i>LesACO1</i></b>     | ACC oxidase 1                                          | Lepidium                        | GQ221031<br>(At2g19590)       | qPat2g19590-F<br>CGCTTCTGTA CTACATCATA  | qPat2g19590-R<br>CTGAATCAGCAAGATTCTGAC  |
| <b><i>LesACO2</i></b>     | ACC oxidase 2                                          | Lepidium                        | GQ221032<br>(At1g62380)       | Ls-aco2-qP-F3<br>AGACTTTGGGAAGAGATTGGAG | Ls-aco2-qP-R3<br>AGGTTGGACCTTTAGTTCCAC  |
| <b><i>LesACO4</i></b>     | ACC oxidase 4                                          | Lepidium                        | GQ221033<br>(At1g05010)       | Ls-aco3-qP-F2<br>GGTTAAGCATTCAATTGTGGT  | Ls-aco3-qP-R1<br>CATCTGTCTGAGATATCACTCT |
| <b><i>LesCYP707A2</i></b> | ABA 8'-hydroxylase<br>CYP707A2                         | Lepidium                        | GQ221028<br>(At2g29090)       | Les-cypA2-F2<br>AAGAGCTTTCATGCCGGATTC   | Les-cypA2-R2<br>GAGATTAGTTCCATCCCATGAA  |
| <b><i>LesCYP707A3</i></b> | ABA 8'-hydroxylase<br>CYP707A3                         | Lepidium                        | GQ221029<br>(At5g45340)       | Les-cypA3-F<br>ATCAACACCCTCGAACACATG    | Les-cypA3-R<br>TCAATTTCAAGTGGCCTCCTCTT  |
| <b><i>LesCTR1</i></b>     | Constitutive Triple<br>Response 1                      | Lepidium                        | GQ221030<br>(At5g03730)       | Ls-ctr1-qP-F1<br>GATCACAGGTTGAATAACCAG  | Ls-ctr1-qP-R1<br>CACTCGATTGTCTCTGCAAC   |
| <b><i>CTR1-like</i></b>   | Putative CTR1-like serine/<br>threonine protein kinase | Arabidopsis                     | At4g24480                     | At4g24480-F<br>TGGTTGAGCAGTTGCATTC      | At4g24480-R<br>CAGCAAGCTTCCATTAGAGAT    |
| <b><i>PL1</i></b>         | Pectate lyase 1                                        | Arabidopsis                     | At1g04680                     | At1g04680-F<br>CTTCAACCGCAAGTTAACACA    | At1g04680-R<br>CAAACAACCAACAACACTTCG    |
| <b><i>ARL</i></b>         | Agros-like, putative cell<br>expansion gene            | Arabidopsis                     | At2g44080                     | At2g44080-F<br>TCGGACATTGTCTGTCGCAG     | At2g44080-R<br>CCAACAAGCACAACCATTGAT    |
| <b><i>AAO3</i></b>        | Abscisic aldehyde oxidase<br>3                         | Arabidopsis                     | At2g27150                     | aao3-f1<br>GTTGGAGCTGCCTTACAAGC         | aao3-r1<br>TGAATGCTCCATGAAGACAG         |
| <b><i>NCED9</i></b>       | Nine- <i>cis</i> -epoxycarotenoid<br>dioxygenase 9     | Arabidopsis                     | At1g78390                     | nced9-f1<br>TCGGTTAGCTACGCTTGTCTG       | nced9-r1<br>GTCCGTGAAGCTCTCCAATT        |
| <b><i>SDR1</i></b>        | Short-chain dehydro-<br>genase reductase 1             | Arabidopsis                     | At1g52340                     | sdr1-f1<br>TGAGTGAGTTGAGATGACC          | sdr1-r1<br>ACCTCCCACACTACATAAGG         |
| <b><i>EF1a</i></b>        | Translation elongation<br>factor 1-alpha               | Arabidopsis                     | At5g60390                     | ef1-F<br>TGAGCACGCTCTTCTTGCT            | ef1-R<br>GTGGCATCCATCTTGTTACA           |
| <b><i>ACT7</i></b>        | Actin 7                                                | Arabidopsis                     | At5g09810                     | act7-F<br>GGTCGTACAACCGGTATTGT          | act7-R<br>GAAGAGCATACCCCTCGTA           |

<sup>a</sup> Primer were designed within the GST regions of the CATMA array probes for either the Lepidium or the Arabidopsis cDNA sequence.

<sup>b</sup> Accession numbers in brackets are the corresponding Arabidopsis orthologs of the Lepidium genes.
